# Supplementary material
Source: PubMed Central journal article supplement (PMC3409668)
Supplement: NIHMS62716-supplement-1File002.pdf [file NIHMS62716-supplement-1File002.pdf]

## **Supporting Information**

### **Probing the sequence effects on *NarI*-induced -2 frameshift mutagenesis by dynamic $^{19}\text{F}$ NMR, UV and CD spectroscopy**

Nidhi Jain, Yuyuan Li, Li Zhang, Srinivasa Meneni, and Bongsup Cho\*

*Department of Biomedical and Pharmaceutical Sciences, College of Pharmacy, University of Rhode Island, Kingston, RI 02881*

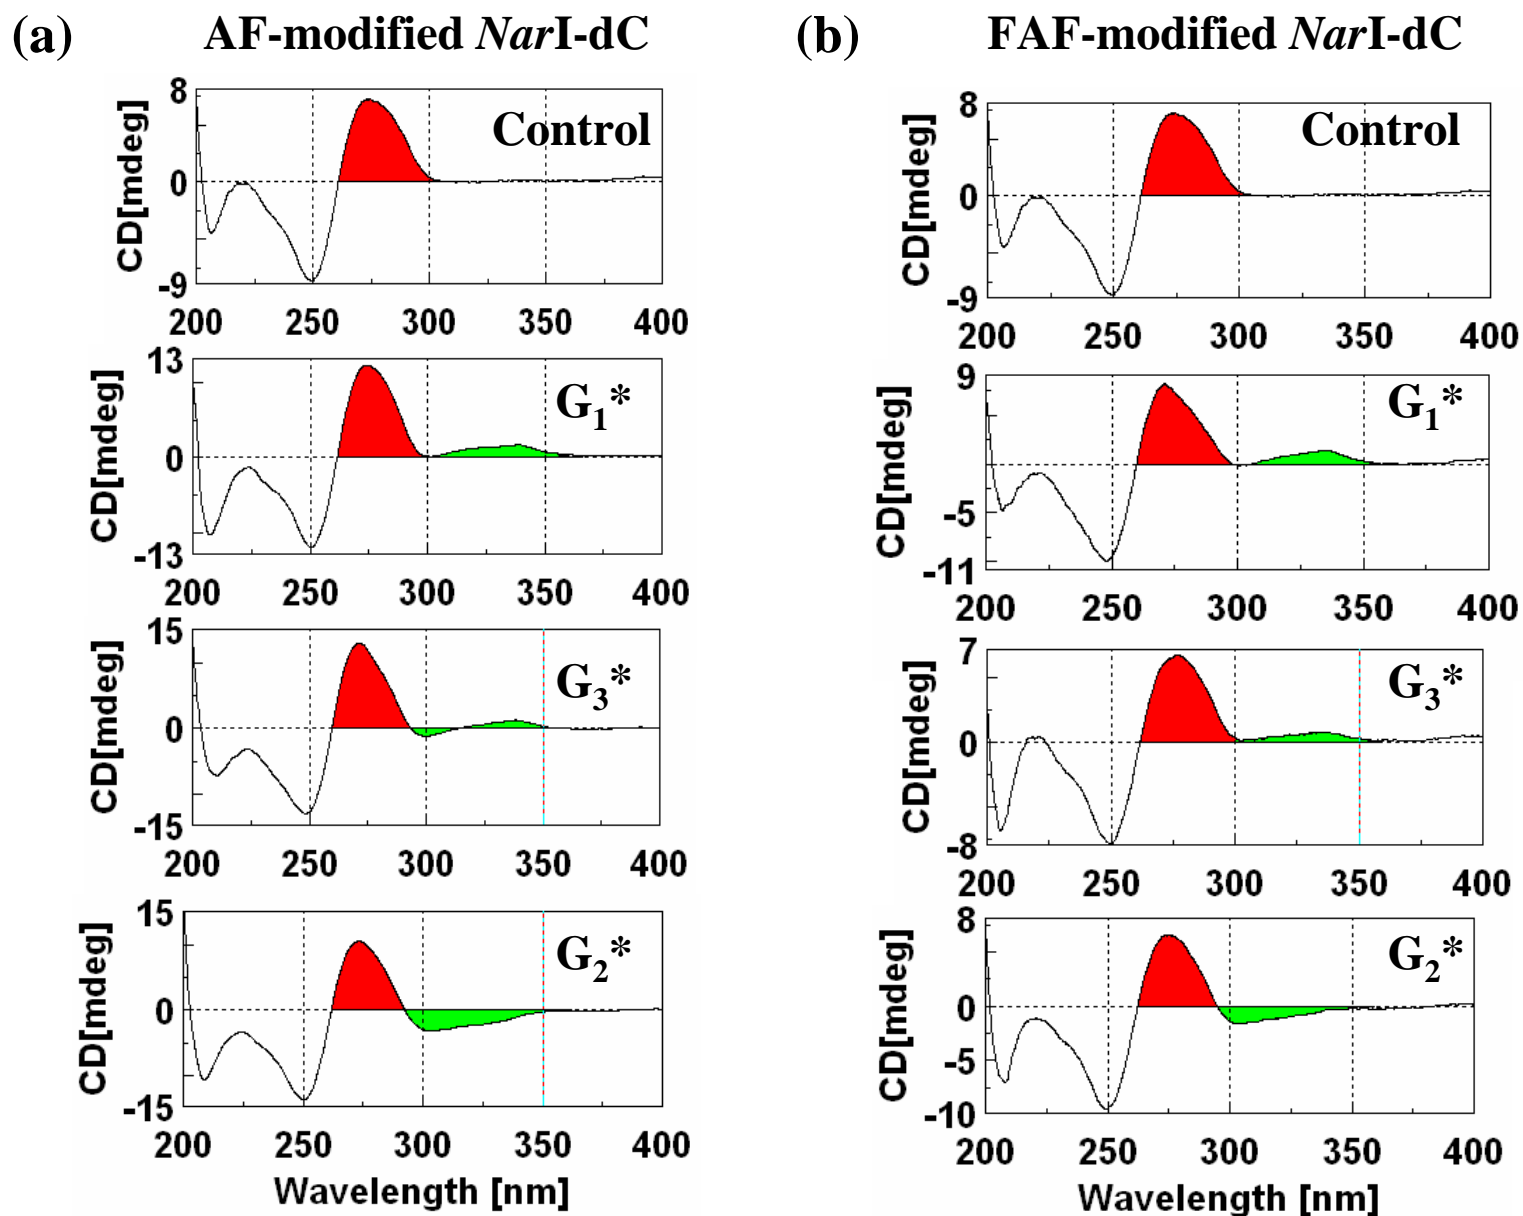

**Figure S1.** CD spectra of *NarI*-dC duplexes recorded at 15 °C for (a) the AF- and (b) FAF-modified duplex series ( $G^*$  denotes adduct site). See Figure 1 for structure and sequence details. The carcinogen-induced ellipticities in the 290-360 nm range ( $ICD_{290-360nm}$ ) are highlighted with green.

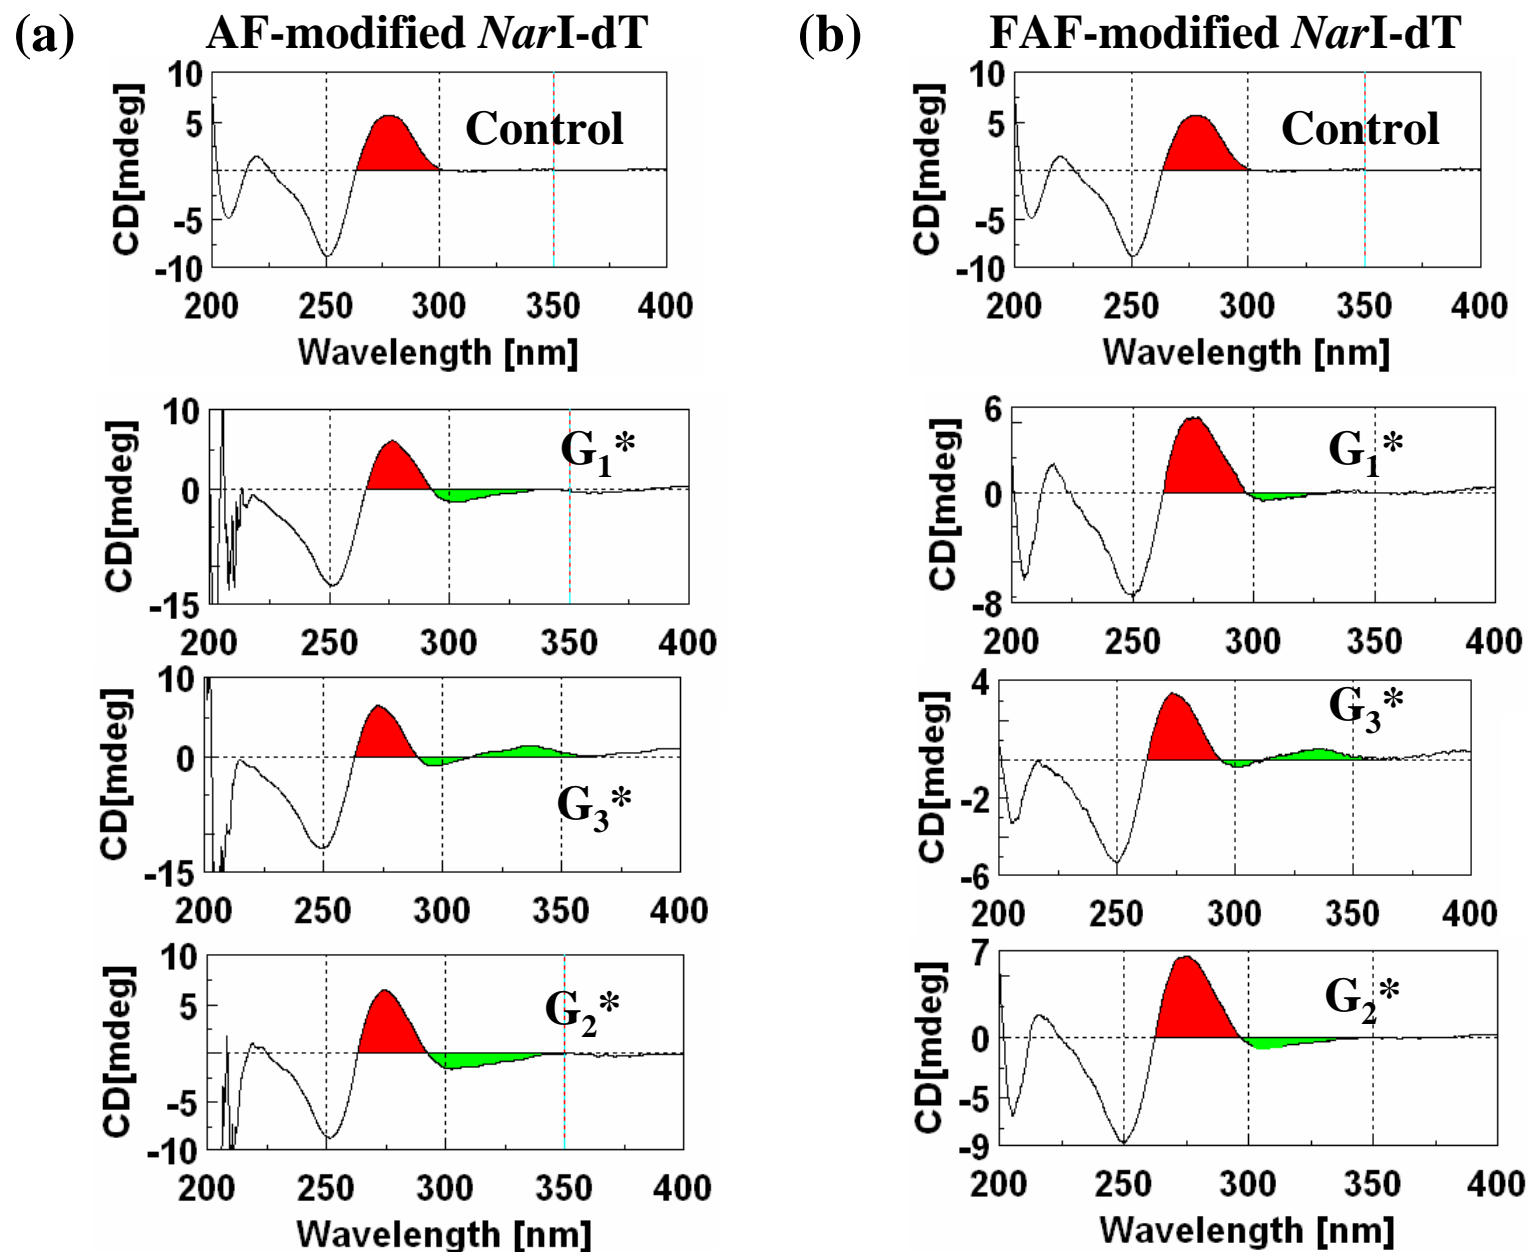

**Figure S2.** CD spectra of *NarI*-dT duplexes recorded at 15 °C for (A) the AF- and (B) FAF-modified series ( $G^*$  denotes adduct site). See Figure 1 for structure and sequence details. The carcinogen-induced ellipticities (either positive or negative) in the 290-360 nm range are highlighted with green.

**(a)**

CTCGG\*CGCCATC  
GAGCC GCGGTAG

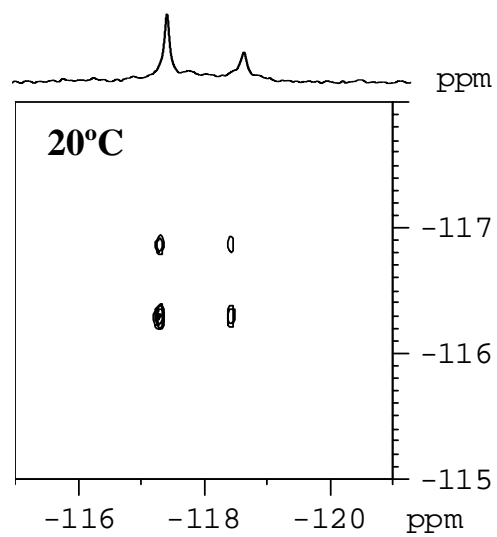

**(b)**

CTCGG\*CGCTATC  
GAGCC GCGATAG

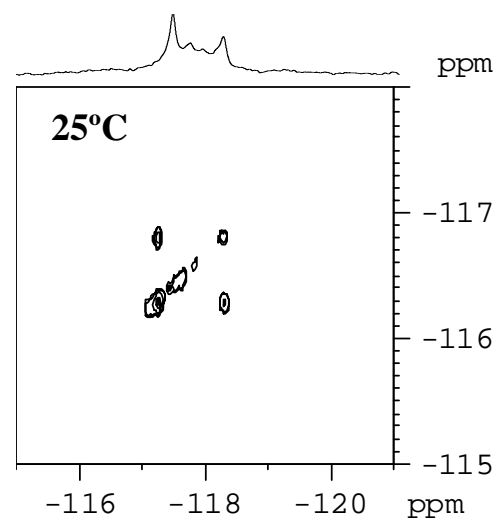

**Figure S3.** Examples of NOESY contour spectra: G2-FAF-modified (a) *NarI*-dC at 20°C (b) *NarI*-dT at 25°C.

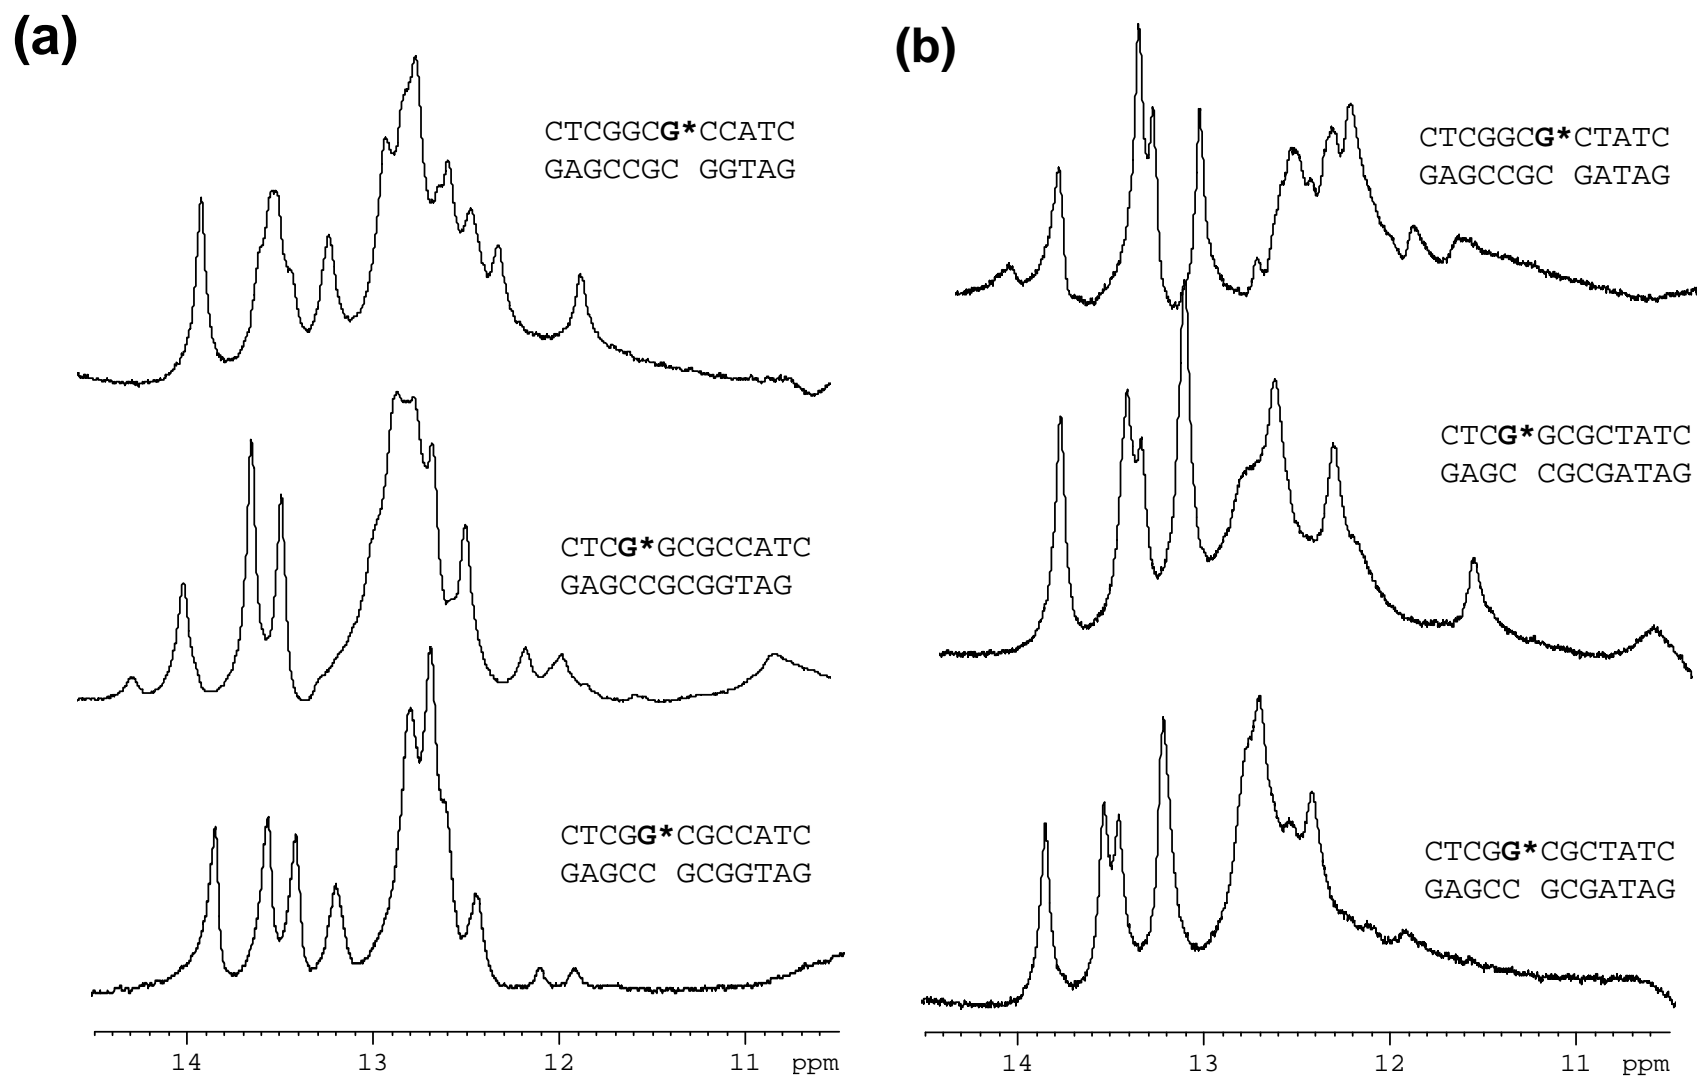

**Figure S4.** Imino proton spectra of fully-paired FAF-modified (a) *NarI*-dC and (b) *NarI*-dT duplexes recorded at 5° C

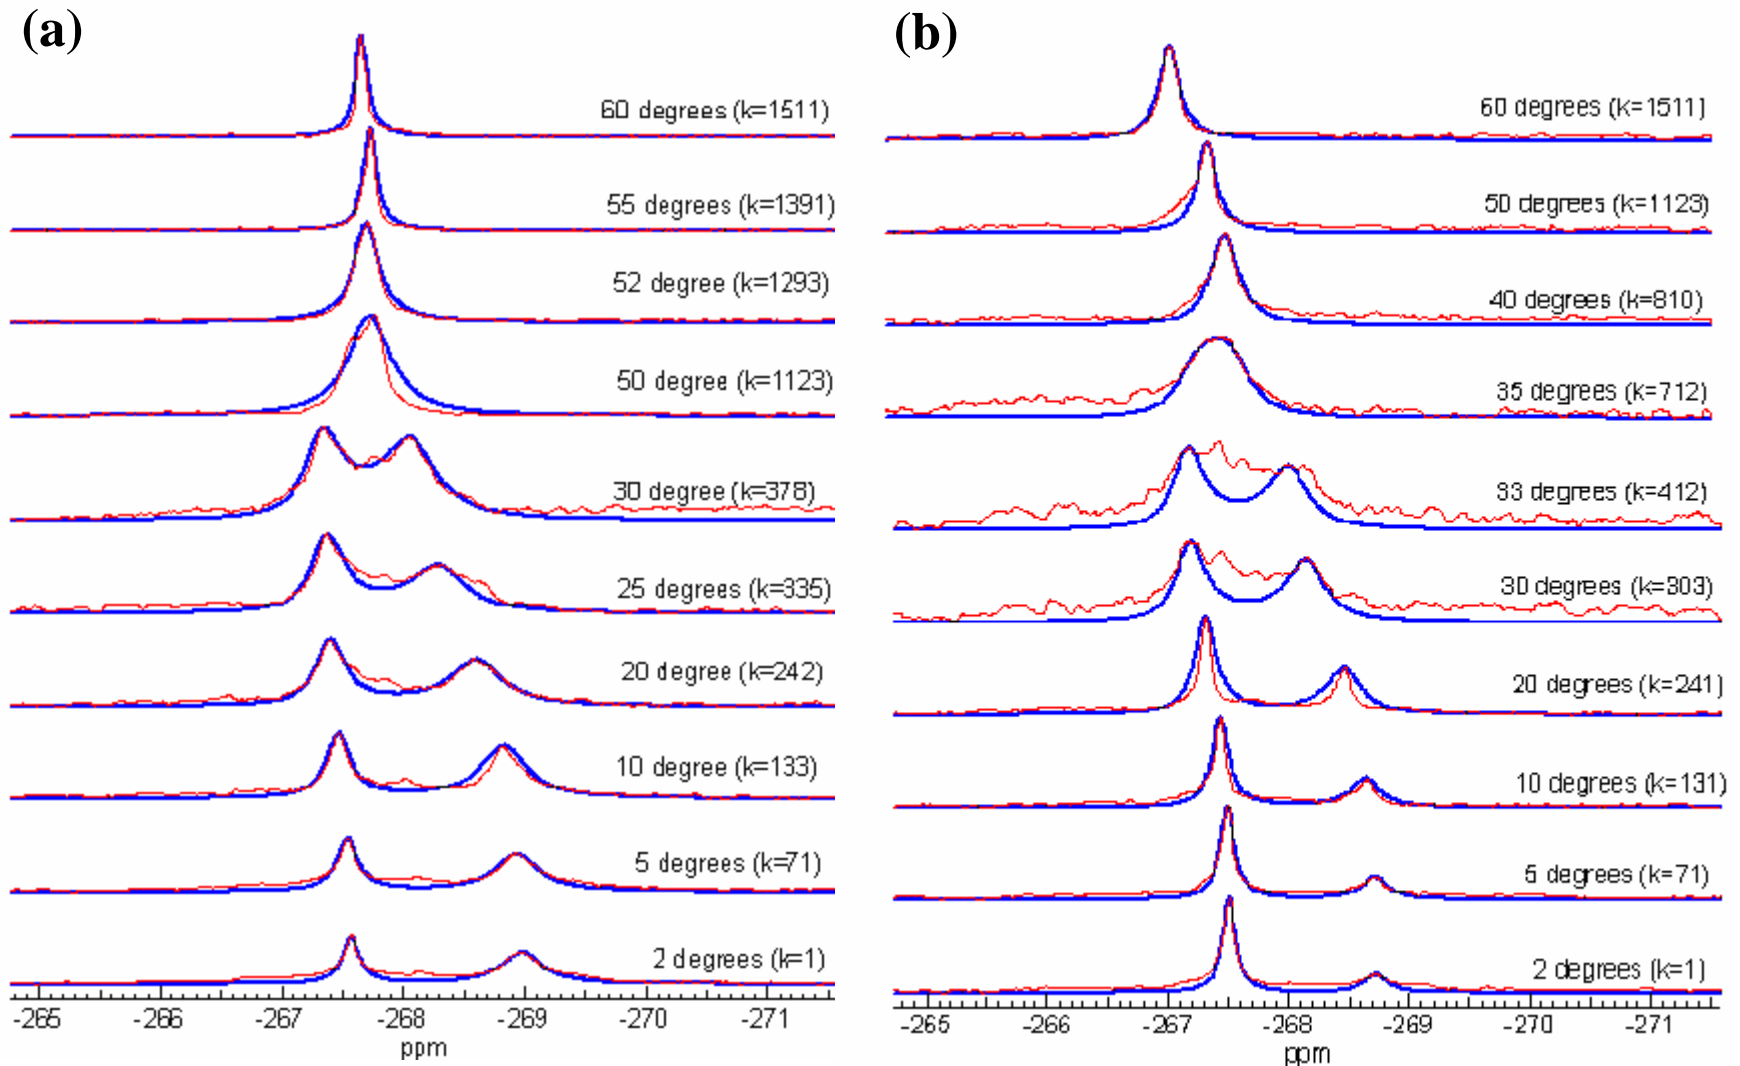

**Figure S5.** Complete line shape analysis of dynamic NMR spectra of (a) *NarI*-dC/G1 and (b) *NarI*-dC/G2 duplexes.

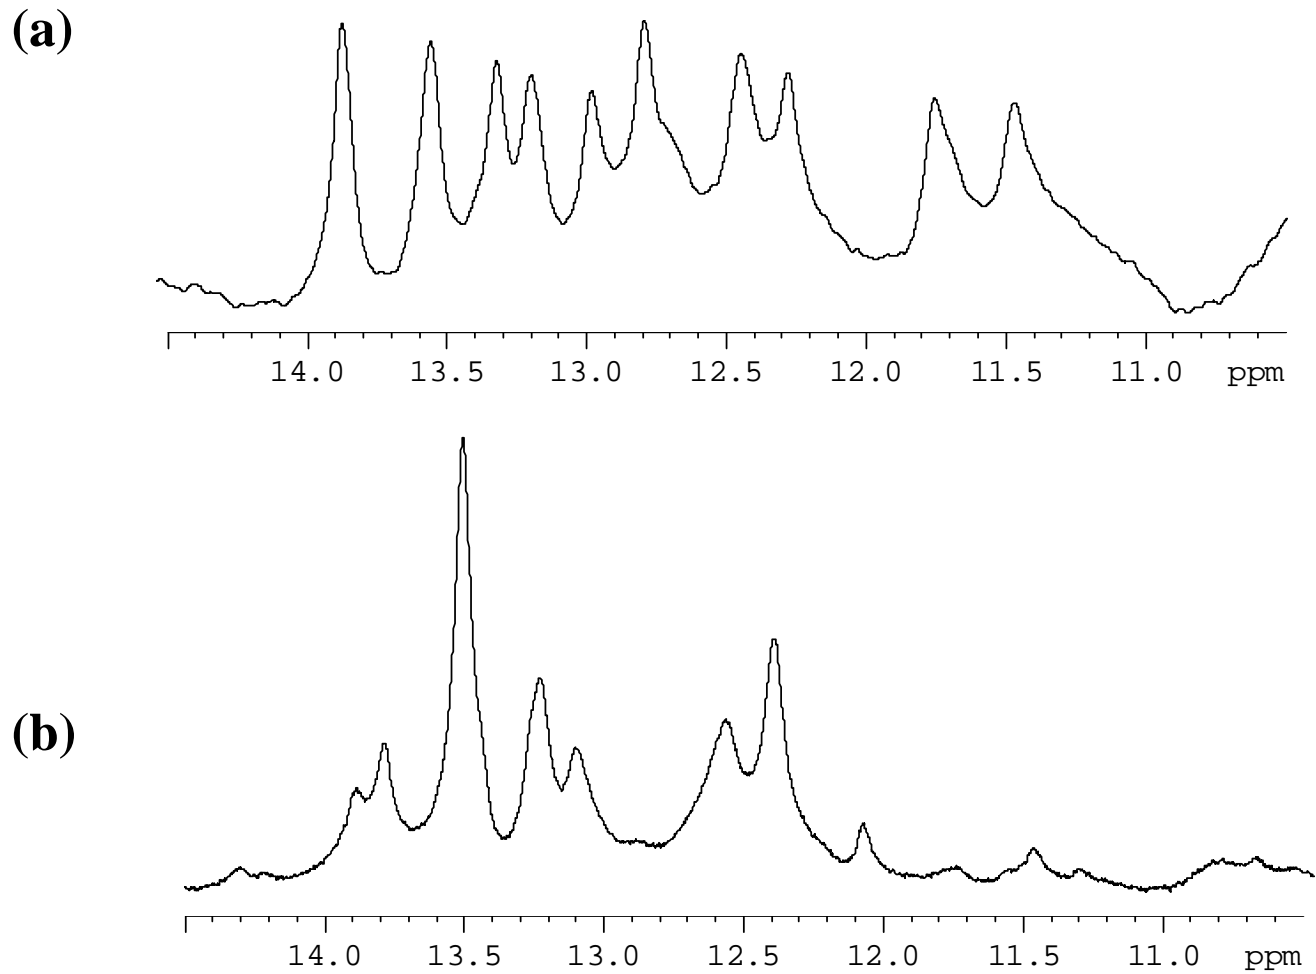

**Figure S6.** Imino proton spectra of (a) *NarI*-dC/-2 and (b) *NarI*-dT/-2 deletion duplexes recorded at 5 °C.

**Table S1:** Calculated and measured molecular weights for the AF- and FAF-modified 12-mer *NarI* sequences used in this study.

| <b>Sample</b>           | <b>Sequence</b>   | <b>Calculated Mass</b> | <b>Measured Mass</b> |
|-------------------------|-------------------|------------------------|----------------------|
| <i>NarI</i> -dC-G3[AF]  | CTCGGCG(AF)CCATC  | 3,759.70               | 3,759.69             |
| <i>NarI</i> -dC-G1[AF]  | CTCG(AF)GCGCCATC  | 3,759.70               | 3,759.68             |
| <i>NarI</i> -dC-G2[AF]  | CTCGG(AF)CGCCATC  | 3,759.70               | 3,759.69             |
| <i>NarI</i> -dT-G3[AF]  | CTCGGCG(AF)CTATC  | 3,792.69               | 3,792.70             |
| <i>NarI</i> -dT-G1[AF]  | CTCG(AF)GCGCTATC  | 3,792.69               | 3,792.66             |
| <i>NarI</i> -dT-G2[AF]  | CTCGG(AF)CGCTATC  | 3,792.69               | 3,792.68             |
| <i>NarI</i> -dC-G3[FAF] | CTCGGCG(FAF)CCATC | 3,777.69               | 3,777.69             |
| <i>NarI</i> -dC-G1[FAF] | CTCG(FAF)GCGCCATC | 3,777.69               | 3,777.70             |
| <i>NarI</i> -dC-G2[FAF] | CTCGG(FAF)CGCCATC | 3,777.69               | 3,777.66             |
| <i>NarI</i> -dT-G3[FAF] | CTCGGCG(FAF)CTATC | 3,792.69               | 3,792.65             |
| <i>NarI</i> -dT-G1[FAF] | CTCG(FAF)GCGCTATC | 3,792.69               | 3,792.64             |
| <i>NarI</i> -dT-G2[FAF] | CTCGG(FAF)CGCTATC | 3,792.69               | 3,792.67             |



**Table S2:** Summary of the H/D Isotope effects for fully-paired and -2 deletion FAF-modified *NarI*-dC and *NarI*-dT duplexes<sup>a</sup>

| Duplex                         | <sup>19</sup> FNMR $\delta$ in 90% H <sub>2</sub> O/10% D <sub>2</sub> O buffer at 20 ° C (ppm) | <sup>19</sup> FNMR $\delta$ in 100% D <sub>2</sub> O buffer at 20 ° C (ppm) | $\Delta\delta$ (ppm) <sup>b</sup> |
|--------------------------------|-------------------------------------------------------------------------------------------------|-----------------------------------------------------------------------------|-----------------------------------|
| <i>NarI</i> -dC/G3[FAF]        | -117.33                                                                                         | -117.52                                                                     | 0.19                              |
|                                | -118.73                                                                                         | -118.80                                                                     | 0.07                              |
| <i>NarI</i> -dC/G1[FAF]        | -117.38                                                                                         | -117.66                                                                     | 0.28                              |
|                                | -118.51                                                                                         | -118.74                                                                     | 0.18                              |
| <i>NarI</i> -dC/G2[FAF]        | -117.30                                                                                         | -117.52                                                                     | 0.22                              |
|                                | -118.40                                                                                         | -118.51                                                                     | 0.11                              |
|                                |                                                                                                 |                                                                             |                                   |
| <i>NarI</i> -dT/G3[FAF]        | -117.46                                                                                         | -117.76                                                                     | 0.30                              |
|                                | -118.85                                                                                         | -118.99                                                                     | 0.14                              |
| <i>NarI</i> -dT/G1[FAF]        | -117.45                                                                                         | -117.64                                                                     | 0.19                              |
|                                | -118.21                                                                                         | -118.28                                                                     | 0.07                              |
|                                | -119.05                                                                                         | -119.09                                                                     | 0.04                              |
| <i>NarI</i> -dT/G2[FAF]        | -117.42                                                                                         | -117.65                                                                     | 0.23                              |
|                                | -118.60                                                                                         | -118.68                                                                     | 0.08                              |
| <i>NarI</i> -dC/G3[FAF]/-2 del | -118.073                                                                                        | -118.095                                                                    | 0.02                              |
| <i>NarI</i> -dT/G3[FAF]/-2 del | -116.47                                                                                         | -116.51                                                                     | 0.04                              |
|                                | -117.79                                                                                         | -117.94                                                                     | 0.15                              |
|                                | -119.19                                                                                         | -119.23                                                                     | 0.04                              |

<sup>a</sup>The rationale for the H/D isotope effect is that the <sup>19</sup>F resonance of the exposed FAF residue in a B-conformer should be more susceptible to solvent-induced shielding (usually > 0.2 ppm) than the buried FAF in an S-conformer (in most cases < 0.1 ppm) when the deuterium content is increased from 10 to 100% (9). <sup>b</sup>  $\delta$  in H<sub>2</sub>O buffer –  $\delta$  in D<sub>2</sub>O buffer at 20°C (ppm).
